# Supplementary material for: Quantum mechanical and classical calculation of the transport and relaxation properties of He⋯CO2 complex using a new PES
Source: Royal Society of Chemistry journal article supplement (doi:10.1039/d2cp05924j), 2023-01-01
Supplement: d2cp05924j1.pdf [file d2cp05924j1.pdf]

**Supplementary Information**

**For**

**Quantum Mechanical and Classical Calculation of the Transport and  
Relaxation Properties of He...CO<sub>2</sub> Complex Using a New PES**

Ebrahim Nemati-Kande, <sup>a\*</sup> Fatemeh Aghababaei, <sup>a</sup> Salar Sadeghi, <sup>a</sup>

<sup>a</sup> *Department of Physical Chemistry, Chemistry Faculty, Urmia University, Urmia, Iran*

---

\*Corresponding author.

E-mail address: [e.nemati@urmia.ac.ir](mailto:e.nemati@urmia.ac.ir)

**Table S.1.** The SBE transport and relaxation properties at different temperatures for even parity of He...CO<sub>2</sub> complex.

| T (K) | $\mathcal{E}^{(1)}_{\text{D}}$ | $\mathcal{E}^{(2)}_{\eta}$ | $\mathcal{E}_{\text{T}}$ | $\mathcal{E}_{\text{DPR}}$ | $\mathcal{E}_{\text{prod}}$ | $\mathcal{E}_{\text{ROT}}$ | $D_{12}(\text{cm}^2.\text{s}^{-1})$ | $\eta_{12}(\mu\text{Pa.s})$ |
|-------|--------------------------------|----------------------------|--------------------------|----------------------------|-----------------------------|----------------------------|-------------------------------------|-----------------------------|
| 25    | 12.173                         | 0.747                      | 25.173                   | 36.928                     | 0.228                       | 48.196                     | 0.006                               | 1.691                       |
| 50    | 8.672                          | 0.533                      | 14.207                   | 22.615                     | 0.151                       | 29.308                     | 0.025                               | 3.354                       |
| 75    | 7.462                          | 0.457                      | 10.618                   | 17.569                     | 0.122                       | 22.428                     | 0.054                               | 4.790                       |
| 100   | 6.856                          | 0.419                      | 8.864                    | 14.985                     | 0.107                       | 18.856                     | 0.091                               | 6.032                       |
| 125   | 6.485                          | 0.396                      | 7.823                    | 13.406                     | 0.097                       | 16.658                     | 0.134                               | 7.138                       |
| 150   | 6.229                          | 0.380                      | 7.122                    | 12.332                     | 0.090                       | 15.149                     | 0.183                               | 8.146                       |
| 175   | 6.038                          | 0.368                      | 6.608                    | 11.547                     | 0.085                       | 14.033                     | 0.238                               | 9.081                       |
| 200   | 5.888                          | 0.359                      | 6.209                    | 10.941                     | 0.080                       | 13.162                     | 0.298                               | 9.958                       |
| 225   | 5.767                          | 0.351                      | 5.885                    | 10.454                     | 0.077                       | 12.455                     | 0.364                               | 10.789                      |
| 250   | 5.664                          | 0.345                      | 5.614                    | 10.049                     | 0.073                       | 11.863                     | 0.434                               | 11.583                      |
| 275   | 5.576                          | 0.339                      | 5.381                    | 9.704                      | 0.071                       | 11.356                     | 0.508                               | 12.346                      |
| 300   | 5.499                          | 0.334                      | 5.177                    | 9.405                      | 0.068                       | 10.913                     | 0.587                               | 13.083                      |
| 325   | 5.430                          | 0.330                      | 4.995                    | 9.141                      | 0.066                       | 10.521                     | 0.670                               | 13.797                      |
| 350   | 5.368                          | 0.326                      | 4.831                    | 8.905                      | 0.064                       | 10.170                     | 0.758                               | 14.491                      |
| 375   | 5.311                          | 0.323                      | 4.679                    | 8.692                      | 0.062                       | 9.855                      | 0.849                               | 15.168                      |
| 400   | 5.258                          | 0.319                      | 4.539                    | 8.499                      | 0.060                       | 9.568                      | 0.945                               | 15.829                      |
| 425   | 5.209                          | 0.316                      | 4.407                    | 8.321                      | 0.058                       | 9.307                      | 1.045                               | 16.475                      |
| 450   | 5.163                          | 0.313                      | 4.281                    | 8.157                      | 0.056                       | 9.068                      | 1.149                               | 17.108                      |
| 475   | 5.119                          | 0.311                      | 4.161                    | 8.005                      | 0.055                       | 8.848                      | 1.256                               | 17.728                      |
| 500   | 5.077                          | 0.308                      | 4.046                    | 7.864                      | 0.053                       | 8.645                      | 1.368                               | 18.337                      |
| 525   | 5.037                          | 0.306                      | 3.935                    | 7.733                      | 0.052                       | 8.457                      | 1.484                               | 18.935                      |
| 550   | 4.999                          | 0.303                      | 3.827                    | 7.609                      | 0.051                       | 8.283                      | 1.603                               | 19.524                      |
| 575   | 4.962                          | 0.301                      | 3.722                    | 7.493                      | 0.049                       | 8.121                      | 1.726                               | 20.102                      |
| 600   | 4.926                          | 0.299                      | 3.620                    | 7.384                      | 0.048                       | 7.970                      | 1.854                               | 20.672                      |
| 625   | 4.891                          | 0.297                      | 3.521                    | 7.282                      | 0.047                       | 7.829                      | 1.985                               | 21.233                      |
| 650   | 4.857                          | 0.296                      | 3.425                    | 7.185                      | 0.046                       | 7.697                      | 2.120                               | 21.786                      |
| 675   | 4.824                          | 0.294                      | 3.331                    | 7.093                      | 0.045                       | 7.573                      | 2.259                               | 22.332                      |
| 700   | 4.791                          | 0.292                      | 3.240                    | 7.005                      | 0.044                       | 7.457                      | 2.402                               | 22.871                      |
| 725   | 4.759                          | 0.291                      | 3.152                    | 6.923                      | 0.043                       | 7.348                      | 2.548                               | 23.403                      |
| 750   | 4.727                          | 0.289                      | 3.065                    | 6.844                      | 0.042                       | 7.245                      | 2.699                               | 23.928                      |
| 775   | 4.696                          | 0.288                      | 2.982                    | 6.769                      | 0.041                       | 7.148                      | 2.854                               | 24.448                      |
| 800   | 4.666                          | 0.286                      | 2.900                    | 6.698                      | 0.040                       | 7.056                      | 3.013                               | 24.962                      |
| 825   | 4.636                          | 0.285                      | 2.822                    | 6.630                      | 0.040                       | 6.969                      | 3.175                               | 25.471                      |
| 850   | 4.606                          | 0.284                      | 2.745                    | 6.564                      | 0.039                       | 6.887                      | 3.342                               | 25.974                      |
| 875   | 4.577                          | 0.282                      | 2.671                    | 6.502                      | 0.038                       | 6.809                      | 3.513                               | 26.474                      |
| 900   | 4.547                          | 0.281                      | 2.599                    | 6.443                      | 0.037                       | 6.735                      | 3.689                               | 26.970                      |
| 925   | 4.518                          | 0.280                      | 2.529                    | 6.385                      | 0.037                       | 6.664                      | 3.868                               | 27.461                      |
| 950   | 4.490                          | 0.279                      | 2.462                    | 6.331                      | 0.036                       | 6.597                      | 4.052                               | 27.950                      |
| 975   | 4.461                          | 0.277                      | 2.396                    | 6.278                      | 0.035                       | 6.532                      | 4.239                               | 28.436                      |
| 1000  | 4.433                          | 0.276                      | 2.333                    | 6.228                      | 0.035                       | 6.471                      | 4.432                               | 28.920                      |
| 1025  | 4.405                          | 0.275                      | 2.272                    | 6.179                      | 0.034                       | 6.411                      | 4.628                               | 29.402                      |
| 1050  | 4.377                          | 0.274                      | 2.212                    | 6.133                      | 0.034                       | 6.354                      | 4.829                               | 29.884                      |
| 1075  | 4.349                          | 0.273                      | 2.155                    | 6.088                      | 0.033                       | 6.299                      | 5.035                               | 30.364                      |
| 1100  | 4.321                          | 0.272                      | 2.099                    | 6.044                      | 0.032                       | 6.246                      | 5.245                               | 30.845                      |
| 1125  | 4.293                          | 0.270                      | 2.045                    | 6.002                      | 0.032                       | 6.194                      | 5.460                               | 31.326                      |
| 1150  | 4.266                          | 0.269                      | 1.993                    | 5.962                      | 0.031                       | 6.143                      | 5.680                               | 31.808                      |
| 1175  | 4.238                          | 0.268                      | 1.943                    | 5.923                      | 0.031                       | 6.094                      | 5.904                               | 32.292                      |
| 1200  | 4.210                          | 0.267                      | 1.894                    | 5.885                      | 0.030                       | 6.046                      | 6.134                               | 32.778                      |
| 1225  | 4.183                          | 0.266                      | 1.846                    | 5.849                      | 0.030                       | 5.999                      | 6.368                               | 33.268                      |
| 1250  | 4.155                          | 0.265                      | 1.801                    | 5.813                      | 0.029                       | 5.952                      | 6.607                               | 33.761                      |
| 1275  | 4.128                          | 0.263                      | 1.756                    | 5.779                      | 0.029                       | 5.907                      | 6.852                               | 34.259                      |
| 1300  | 4.100                          | 0.262                      | 1.713                    | 5.746                      | 0.028                       | 5.861                      | 7.102                               | 34.761                      |
| 1325  | 4.073                          | 0.261                      | 1.671                    | 5.713                      | 0.028                       | 5.816                      | 7.357                               | 35.270                      |
| 1350  | 4.045                          | 0.259                      | 1.631                    | 5.682                      | 0.028                       | 5.772                      | 7.618                               | 35.784                      |
| 1375  | 4.017                          | 0.258                      | 1.592                    | 5.651                      | 0.027                       | 5.727                      | 7.885                               | 36.305                      |
| 1400  | 3.990                          | 0.257                      | 1.554                    | 5.621                      | 0.027                       | 5.683                      | 8.157                               | 36.834                      |
| 1425  | 3.962                          | 0.255                      | 1.517                    | 5.592                      | 0.026                       | 5.639                      | 8.435                               | 37.371                      |
| 1450  | 3.934                          | 0.254                      | 1.481                    | 5.564                      | 0.026                       | 5.595                      | 8.719                               | 37.916                      |
| 1475  | 3.906                          | 0.252                      | 1.446                    | 5.536                      | 0.026                       | 5.550                      | 9.010                               | 38.471                      |
| 1500  | 3.878                          | 0.251                      | 1.413                    | 5.508                      | 0.025                       | 5.506                      | 9.306                               | 39.036                      |

**Table S.2.** The SBE transport and relaxation properties at different temperatures for odd parity of He...CO<sub>2</sub> complex.

| T (K) | $\mathcal{E}^{(1)}_{\text{D}}$ | $\mathcal{E}^{(2)}_{\eta}$ | $\mathcal{E}_{\text{T}}$ | $\mathcal{E}_{\text{DPR}}$ | $\mathcal{E}_{\text{prod}}$ | $\mathcal{E}_{\text{ROT}}$ | $D_{12}(\text{cm}^2.\text{s}^{-1})$ | $\eta_{12}(\mu\text{Pa.s})$ |
|-------|--------------------------------|----------------------------|--------------------------|----------------------------|-----------------------------|----------------------------|-------------------------------------|-----------------------------|
| 25    | 12.164                         | 0.747                      | 25.149                   | 36.681                     | 0.226                       | 48.205                     | 0.006                               | 1.691                       |
| 50    | 8.669                          | 0.533                      | 14.181                   | 22.253                     | 0.151                       | 29.285                     | 0.025                               | 3.354                       |
| 75    | 7.460                          | 0.457                      | 10.622                   | 17.281                     | 0.122                       | 22.436                     | 0.054                               | 4.790                       |
| 100   | 6.854                          | 0.419                      | 8.877                    | 14.758                     | 0.107                       | 18.873                     | 0.091                               | 6.033                       |
| 125   | 6.483                          | 0.396                      | 7.837                    | 13.221                     | 0.097                       | 16.675                     | 0.134                               | 7.139                       |
| 150   | 6.227                          | 0.380                      | 7.133                    | 12.177                     | 0.090                       | 15.164                     | 0.183                               | 8.147                       |
| 175   | 6.037                          | 0.368                      | 6.617                    | 11.414                     | 0.085                       | 14.046                     | 0.238                               | 9.081                       |
| 200   | 5.888                          | 0.359                      | 6.216                    | 10.824                     | 0.080                       | 13.174                     | 0.298                               | 9.958                       |
| 225   | 5.766                          | 0.351                      | 5.891                    | 10.350                     | 0.077                       | 12.467                     | 0.364                               | 10.789                      |
| 250   | 5.664                          | 0.345                      | 5.619                    | 9.955                      | 0.073                       | 11.874                     | 0.434                               | 11.583                      |
| 275   | 5.576                          | 0.339                      | 5.385                    | 9.619                      | 0.070                       | 11.366                     | 0.508                               | 12.346                      |
| 300   | 5.500                          | 0.334                      | 5.181                    | 9.327                      | 0.068                       | 10.922                     | 0.587                               | 13.083                      |
| 325   | 5.431                          | 0.330                      | 4.999                    | 9.069                      | 0.066                       | 10.530                     | 0.670                               | 13.797                      |
| 350   | 5.369                          | 0.326                      | 4.834                    | 8.838                      | 0.063                       | 10.179                     | 0.758                               | 14.491                      |
| 375   | 5.312                          | 0.323                      | 4.682                    | 8.630                      | 0.061                       | 9.863                      | 0.849                               | 15.168                      |
| 400   | 5.259                          | 0.319                      | 4.541                    | 8.440                      | 0.060                       | 9.576                      | 0.945                               | 15.828                      |
| 425   | 5.210                          | 0.316                      | 4.408                    | 8.266                      | 0.058                       | 9.314                      | 1.045                               | 16.474                      |
| 450   | 5.164                          | 0.313                      | 4.282                    | 8.105                      | 0.056                       | 9.073                      | 1.148                               | 17.107                      |
| 475   | 5.120                          | 0.311                      | 4.162                    | 7.956                      | 0.055                       | 8.852                      | 1.256                               | 17.728                      |
| 500   | 5.078                          | 0.308                      | 4.046                    | 7.817                      | 0.053                       | 8.648                      | 1.368                               | 18.337                      |
| 525   | 5.038                          | 0.306                      | 3.934                    | 7.688                      | 0.052                       | 8.459                      | 1.483                               | 18.935                      |
| 550   | 5.000                          | 0.303                      | 3.825                    | 7.566                      | 0.050                       | 8.284                      | 1.603                               | 19.523                      |
| 575   | 4.963                          | 0.301                      | 3.720                    | 7.452                      | 0.049                       | 8.121                      | 1.726                               | 20.102                      |
| 600   | 4.927                          | 0.299                      | 3.618                    | 7.345                      | 0.048                       | 7.969                      | 1.853                               | 20.672                      |
| 625   | 4.892                          | 0.297                      | 3.519                    | 7.243                      | 0.047                       | 7.827                      | 1.984                               | 21.234                      |
| 650   | 4.857                          | 0.296                      | 3.422                    | 7.147                      | 0.046                       | 7.693                      | 2.119                               | 21.788                      |
| 675   | 4.824                          | 0.294                      | 3.328                    | 7.057                      | 0.045                       | 7.569                      | 2.258                               | 22.334                      |
| 700   | 4.791                          | 0.292                      | 3.236                    | 6.970                      | 0.044                       | 7.452                      | 2.401                               | 22.873                      |
| 725   | 4.759                          | 0.291                      | 3.147                    | 6.888                      | 0.043                       | 7.342                      | 2.548                               | 23.406                      |
| 750   | 4.727                          | 0.289                      | 3.061                    | 6.811                      | 0.042                       | 7.238                      | 2.699                               | 23.932                      |
| 775   | 4.696                          | 0.288                      | 2.977                    | 6.736                      | 0.041                       | 7.140                      | 2.854                               | 24.453                      |
| 800   | 4.665                          | 0.286                      | 2.895                    | 6.665                      | 0.040                       | 7.047                      | 3.013                               | 24.968                      |
| 825   | 4.635                          | 0.285                      | 2.816                    | 6.598                      | 0.039                       | 6.960                      | 3.176                               | 25.478                      |
| 850   | 4.604                          | 0.283                      | 2.739                    | 6.533                      | 0.039                       | 6.877                      | 3.344                               | 25.983                      |
| 875   | 4.575                          | 0.282                      | 2.665                    | 6.471                      | 0.038                       | 6.798                      | 3.515                               | 26.484                      |
| 900   | 4.545                          | 0.281                      | 2.593                    | 6.412                      | 0.037                       | 6.724                      | 3.690                               | 26.981                      |
| 925   | 4.516                          | 0.280                      | 2.523                    | 6.355                      | 0.036                       | 6.652                      | 3.870                               | 27.475                      |
| 950   | 4.487                          | 0.278                      | 2.456                    | 6.301                      | 0.036                       | 6.584                      | 4.054                               | 27.965                      |
| 975   | 4.458                          | 0.277                      | 2.390                    | 6.248                      | 0.035                       | 6.519                      | 4.243                               | 28.453                      |
| 1000  | 4.429                          | 0.276                      | 2.327                    | 6.198                      | 0.034                       | 6.457                      | 4.435                               | 28.939                      |
| 1025  | 4.401                          | 0.275                      | 2.265                    | 6.150                      | 0.034                       | 6.397                      | 4.633                               | 29.423                      |
| 1050  | 4.372                          | 0.274                      | 2.206                    | 6.103                      | 0.033                       | 6.339                      | 4.834                               | 29.906                      |
| 1075  | 4.344                          | 0.273                      | 2.149                    | 6.058                      | 0.033                       | 6.284                      | 5.041                               | 30.389                      |
| 1100  | 4.316                          | 0.271                      | 2.093                    | 6.015                      | 0.032                       | 6.230                      | 5.252                               | 30.872                      |
| 1125  | 4.287                          | 0.270                      | 2.039                    | 5.974                      | 0.032                       | 6.178                      | 5.468                               | 31.355                      |
| 1150  | 4.259                          | 0.269                      | 1.987                    | 5.933                      | 0.031                       | 6.127                      | 5.688                               | 31.840                      |
| 1175  | 4.231                          | 0.268                      | 1.937                    | 5.894                      | 0.030                       | 6.077                      | 5.914                               | 32.326                      |
| 1200  | 4.203                          | 0.267                      | 1.888                    | 5.857                      | 0.030                       | 6.029                      | 6.144                               | 32.815                      |
| 1225  | 4.175                          | 0.265                      | 1.841                    | 5.820                      | 0.030                       | 5.981                      | 6.379                               | 33.307                      |
| 1250  | 4.147                          | 0.264                      | 1.795                    | 5.785                      | 0.029                       | 5.935                      | 6.620                               | 33.803                      |
| 1275  | 4.119                          | 0.263                      | 1.750                    | 5.750                      | 0.029                       | 5.889                      | 6.866                               | 34.304                      |
| 1300  | 4.091                          | 0.262                      | 1.707                    | 5.717                      | 0.028                       | 5.843                      | 7.117                               | 34.809                      |
| 1325  | 4.063                          | 0.260                      | 1.666                    | 5.685                      | 0.028                       | 5.798                      | 7.374                               | 35.320                      |
| 1350  | 4.035                          | 0.259                      | 1.625                    | 5.653                      | 0.027                       | 5.753                      | 7.637                               | 35.838                      |
| 1375  | 4.007                          | 0.258                      | 1.586                    | 5.623                      | 0.027                       | 5.708                      | 7.905                               | 36.362                      |
| 1400  | 3.979                          | 0.256                      | 1.548                    | 5.593                      | 0.026                       | 5.664                      | 8.179                               | 36.894                      |
| 1425  | 3.951                          | 0.255                      | 1.512                    | 5.564                      | 0.026                       | 5.620                      | 8.459                               | 37.434                      |
| 1450  | 3.922                          | 0.253                      | 1.476                    | 5.535                      | 0.026                       | 5.575                      | 8.745                               | 37.982                      |
| 1475  | 3.894                          | 0.252                      | 1.441                    | 5.507                      | 0.025                       | 5.531                      | 9.037                               | 38.541                      |
| 1500  | 3.866                          | 0.250                      | 1.408                    | 5.480                      | 0.025                       | 5.486                      | 9.336                               | 39.108                      |

**Table S.3.** Calculated interaction viscosity coefficient ( $\eta_{12}$ ) for He...CO<sub>2</sub> complex at different temperatures, using the Mason-Monchick approximation (MMA) and Boltzmann weighting method (BWM).

| $\eta_{12}(\mu\text{Pa}\cdot\text{s})$ |        |        | $\eta_{12}(\mu\text{Pa}\cdot\text{s})$ |        |        | $\eta_{12}(\mu\text{Pa}\cdot\text{s})$ |        |        |
|----------------------------------------|--------|--------|----------------------------------------|--------|--------|----------------------------------------|--------|--------|
| T(K)                                   | BWM    | MMA    | T(K)                                   | BWM    | MMA    | T(K)                                   | BWM    | MMA    |
| 50                                     | 3.150  | 3.072  | 600                                    | 18.894 | 18.830 | 1300                                   | 30.549 | 30.511 |
| 75                                     | 4.480  | 4.389  | 625                                    | 19.383 | 19.321 | 1350                                   | 31.269 | 31.232 |
| 100                                    | 5.648  | 5.550  | 650                                    | 19.864 | 19.804 | 1400                                   | 31.979 | 31.942 |
| 125                                    | 6.688  | 6.586  | 675                                    | 20.338 | 20.279 | 1450                                   | 32.678 | 32.643 |
| 150                                    | 7.631  | 7.529  | 700                                    | 20.805 | 20.747 | 1500                                   | 33.368 | 33.334 |
| 175                                    | 8.500  | 8.400  | 725                                    | 21.266 | 21.209 | 1550                                   | 34.049 | 34.015 |
| 200                                    | 9.312  | 9.214  | 750                                    | 21.720 | 21.665 | 1600                                   | 34.722 | 34.688 |
| 225                                    | 10.078 | 9.983  | 775                                    | 22.168 | 22.114 | 1650                                   | 35.385 | 35.353 |
| 250                                    | 10.805 | 10.713 | 800                                    | 22.611 | 22.557 | 1700                                   | 36.041 | 36.010 |
| 275                                    | 11.501 | 11.411 | 825                                    | 23.048 | 22.996 | 1750                                   | 36.690 | 36.659 |
| 300                                    | 12.169 | 12.082 | 850                                    | 23.480 | 23.428 | 1800                                   | 37.331 | 37.300 |
| 325                                    | 12.814 | 12.729 | 875                                    | 23.907 | 23.856 | 1850                                   | 37.964 | 37.935 |
| 350                                    | 13.438 | 13.356 | 900                                    | 24.329 | 24.279 | 1900                                   | 38.591 | 38.563 |
| 375                                    | 14.043 | 13.963 | 925                                    | 24.746 | 24.697 | 1950                                   | 39.212 | 39.184 |
| 400                                    | 14.632 | 14.554 | 950                                    | 25.159 | 25.111 | 2000                                   | 39.826 | 39.798 |
| 425                                    | 15.206 | 15.130 | 975                                    | 25.568 | 25.521 | 2100                                   | 41.036 | 41.010 |
| 450                                    | 15.766 | 15.692 | 1000                                   | 25.973 | 25.926 | 2200                                   | 42.223 | 42.198 |
| 475                                    | 16.313 | 16.242 | 1050                                   | 26.770 | 26.725 | 2300                                   | 43.389 | 43.365 |
| 500                                    | 16.849 | 16.780 | 1100                                   | 27.552 | 27.509 | 2400                                   | 44.535 | 44.511 |
| 525                                    | 17.375 | 17.307 | 1150                                   | 28.320 | 28.278 | 2500                                   | 45.661 | 45.638 |
| 550                                    | 17.890 | 17.824 | 1200                                   | 29.076 | 29.035 |                                        |        |        |
| 575                                    | 18.396 | 18.332 | 1250                                   | 29.818 | 29.779 |                                        |        |        |

**Table S.4.** Calculated interaction diffusion coefficient ( $D_{12}$ ) for He...CO<sub>2</sub> complex at different temperatures, using the Mason-Monchick approximation (MMA) and Boltzmann weighting method (BWM).

| $D_{12}(\text{cm}^2.\text{s}^{-1})$ |       |       | $D_{12}(\text{cm}^2.\text{s}^{-1})$ |       |       | $D_{12}(\text{cm}^2.\text{s}^{-1})$ |        |        |
|-------------------------------------|-------|-------|-------------------------------------|-------|-------|-------------------------------------|--------|--------|
| T(K)                                | BWM   | MMA   | T(K)                                | BWM   | MMA   | T(K)                                | BWM    | MMA    |
| 50                                  | 0.023 | 0.023 | 600                                 | 1.659 | 1.655 | 1300                                | 5.797  | 5.792  |
| 75                                  | 0.049 | 0.048 | 625                                 | 1.773 | 1.768 | 1350                                | 6.161  | 6.155  |
| 100                                 | 0.083 | 0.081 | 650                                 | 1.890 | 1.885 | 1400                                | 6.532  | 6.527  |
| 125                                 | 0.122 | 0.120 | 675                                 | 2.009 | 2.004 | 1450                                | 6.912  | 6.906  |
| 150                                 | 0.167 | 0.165 | 700                                 | 2.131 | 2.127 | 1500                                | 7.299  | 7.294  |
| 175                                 | 0.217 | 0.215 | 725                                 | 2.256 | 2.251 | 1550                                | 7.694  | 7.689  |
| 200                                 | 0.272 | 0.269 | 750                                 | 2.383 | 2.379 | 1600                                | 8.097  | 8.092  |
| 225                                 | 0.331 | 0.328 | 775                                 | 2.514 | 2.509 | 1650                                | 8.508  | 8.502  |
| 250                                 | 0.394 | 0.391 | 800                                 | 2.646 | 2.641 | 1700                                | 8.926  | 8.920  |
| 275                                 | 0.462 | 0.459 | 825                                 | 2.781 | 2.777 | 1750                                | 9.351  | 9.346  |
| 300                                 | 0.533 | 0.530 | 850                                 | 2.919 | 2.914 | 1800                                | 9.784  | 9.778  |
| 325                                 | 0.609 | 0.605 | 875                                 | 3.059 | 3.054 | 1850                                | 10.224 | 10.218 |
| 350                                 | 0.688 | 0.684 | 900                                 | 3.202 | 3.197 | 1900                                | 10.671 | 10.665 |
| 375                                 | 0.770 | 0.766 | 925                                 | 3.347 | 3.342 | 1950                                | 11.125 | 11.119 |
| 400                                 | 0.856 | 0.852 | 950                                 | 3.495 | 3.490 | 2000                                | 11.585 | 11.580 |
| 425                                 | 0.945 | 0.942 | 975                                 | 3.644 | 3.639 | 2100                                | 12.528 | 12.523 |
| 450                                 | 1.038 | 1.034 | 1000                                | 3.797 | 3.792 | 2200                                | 13.497 | 13.492 |
| 475                                 | 1.134 | 1.130 | 1050                                | 4.108 | 4.103 | 2300                                | 14.493 | 14.488 |
| 500                                 | 1.233 | 1.229 | 1100                                | 4.428 | 4.423 | 2400                                | 15.515 | 15.509 |
| 525                                 | 1.335 | 1.331 | 1150                                | 4.758 | 4.752 | 2500                                | 16.561 | 16.556 |
| 550                                 | 1.440 | 1.436 | 1200                                | 5.096 | 5.090 |                                     |        |        |
| 575                                 | 1.548 | 1.544 | 1250                                | 5.442 | 5.437 |                                     |        |        |

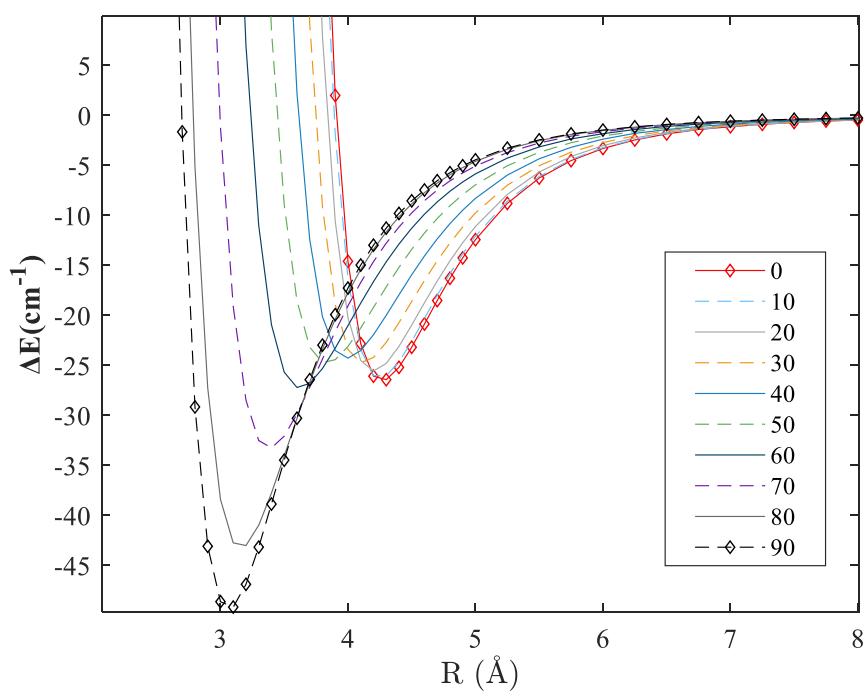

**Fig. S.1.** Calculated potentials for He...CO<sub>2</sub> complex at  $\theta = 0^\circ$ -  $90^\circ$  as function of separation ( $R$ ) between the CO<sub>2</sub> center of mass and He atom using RCCSD(T)/aQz-BF method.

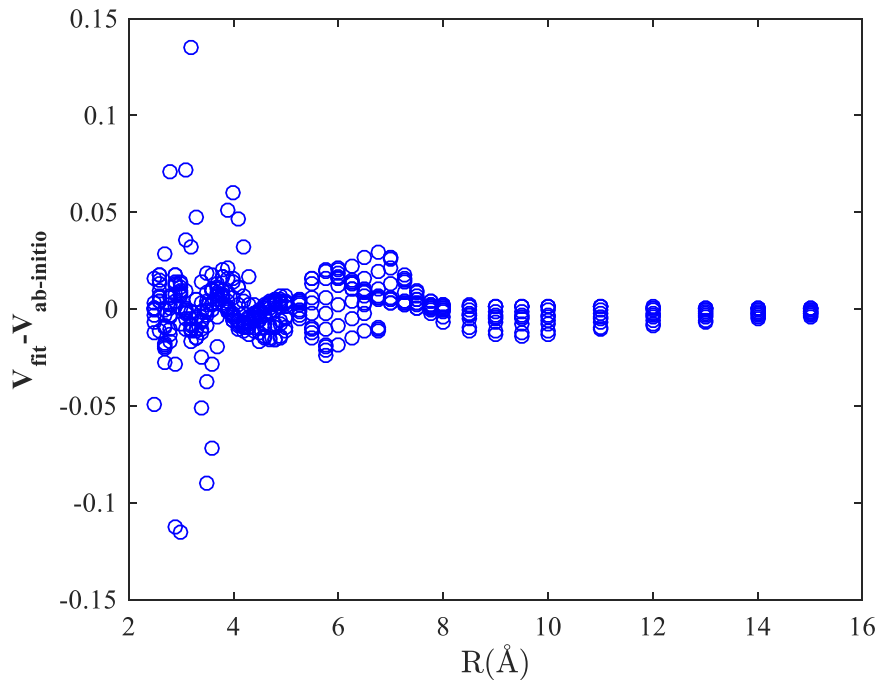

**Fig. S.2.** Deviation of the ab-initio potentials and fitted values for He...CO<sub>2</sub> PES.

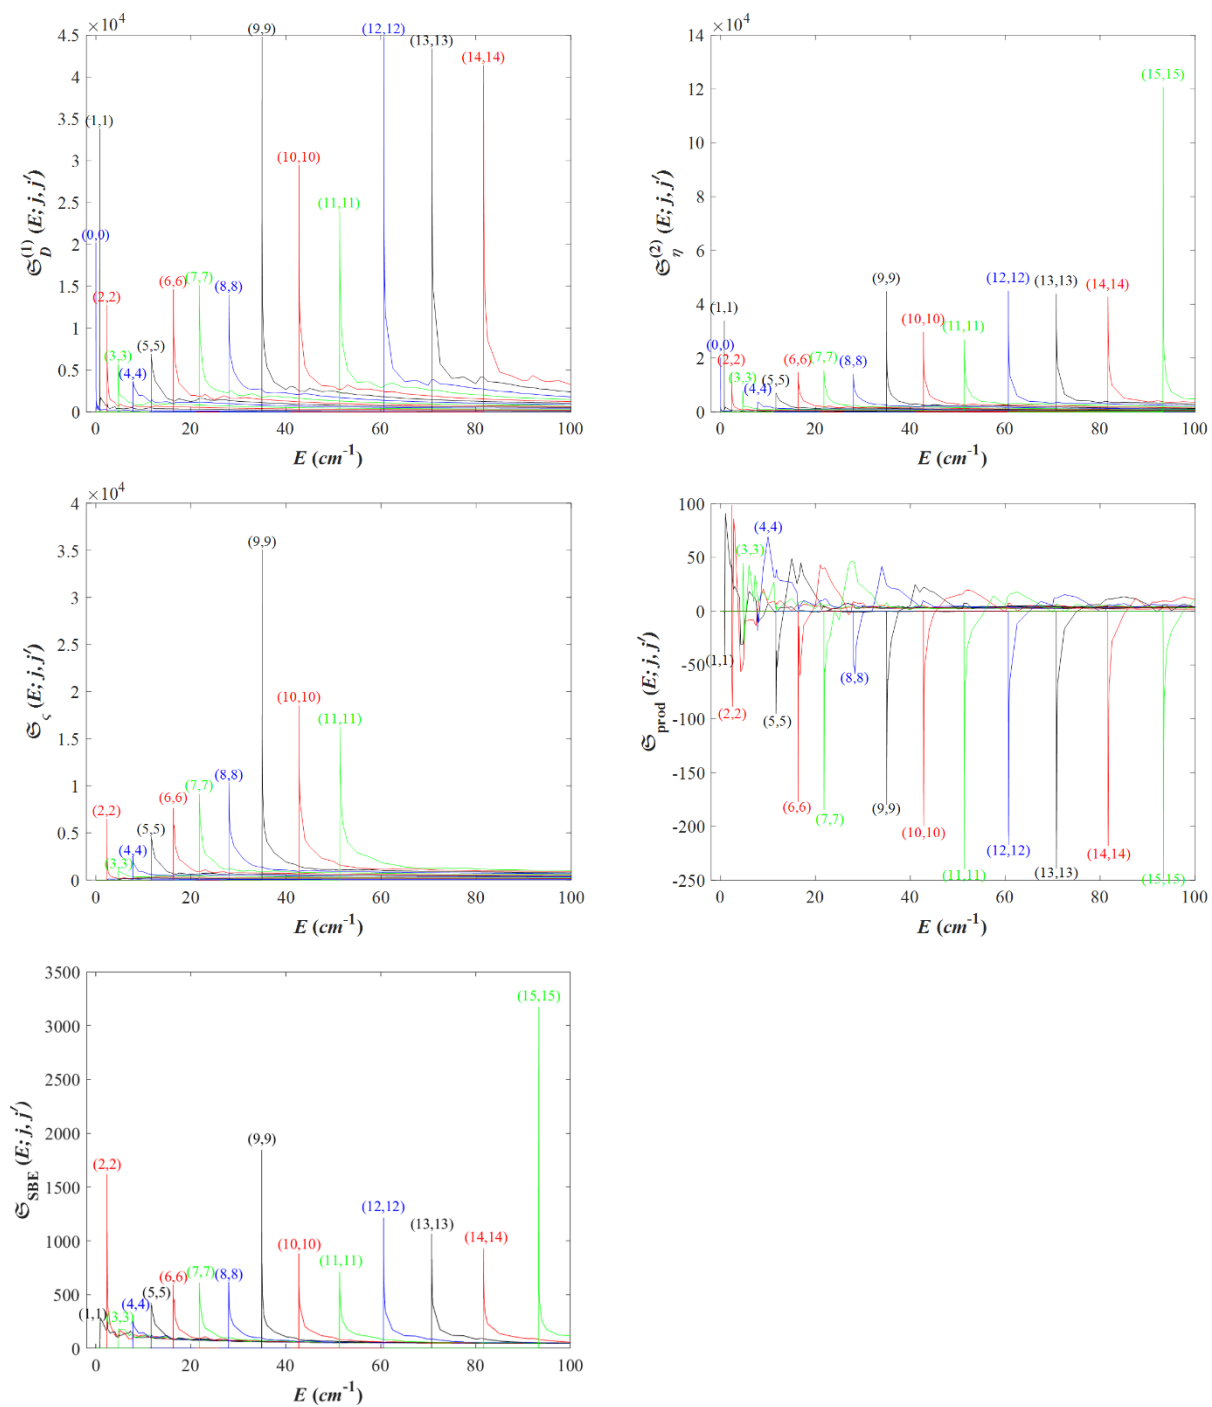

**Fig. S.3.** Energy dependent state-to-state cross sections ( $\mathfrak{S}(E; j, j')$ ) as a function of energy ( $E$ ) for diagonal transitions (i.e.,  $j=j'$  in  $j \rightarrow j'$ ).

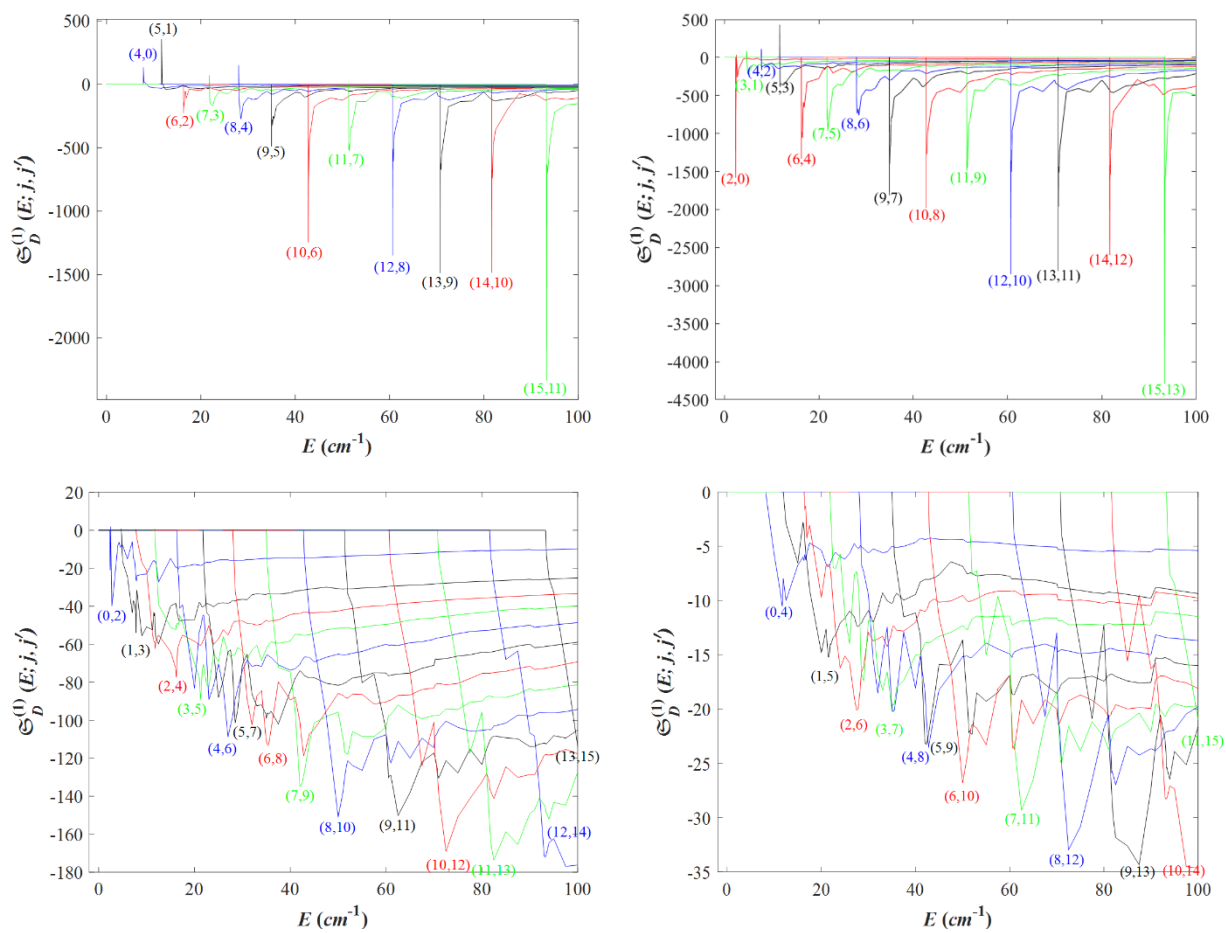

**Fig. S.4.** Energy dependent state-to-state diffusion coefficient cross section ( $\mathfrak{S}_D^{(1)}(E; j, j')$ ) as a function of energy ( $E$ ) for off-diagonal (i.e.,  $j \neq j'$  in  $j \rightarrow j'$ ) rotational transitions.



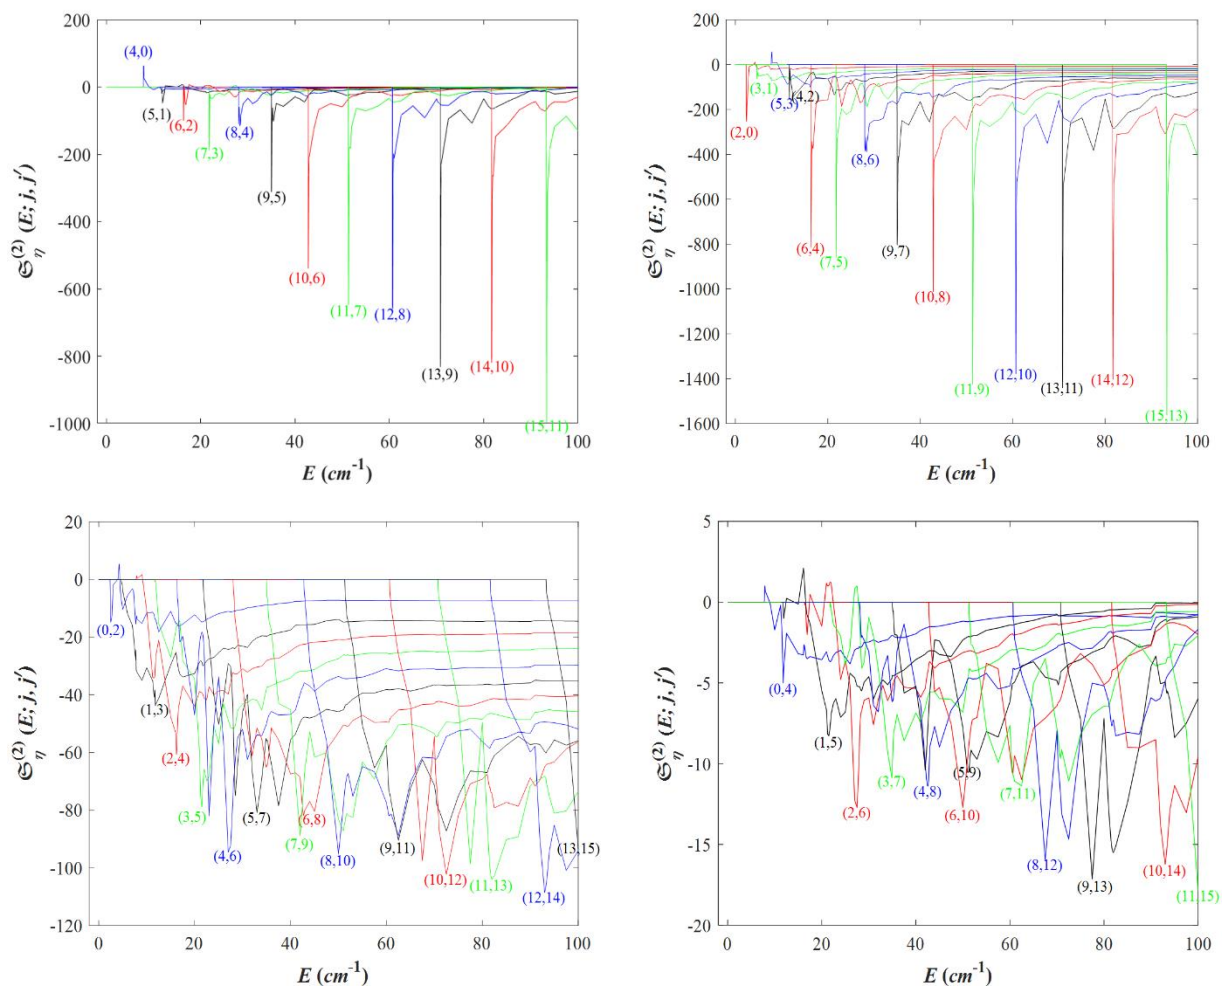

**Fig. S.5.** Energy dependent state-to-state viscosity coefficient cross section ( $\mathfrak{S}_\eta^{(2)}(E; j, j')$ ) as a function of energy ( $E$ ) for off-diagonal (i.e.,  $j \neq j'$  in  $j \rightarrow j'$ ) rotational transitions.

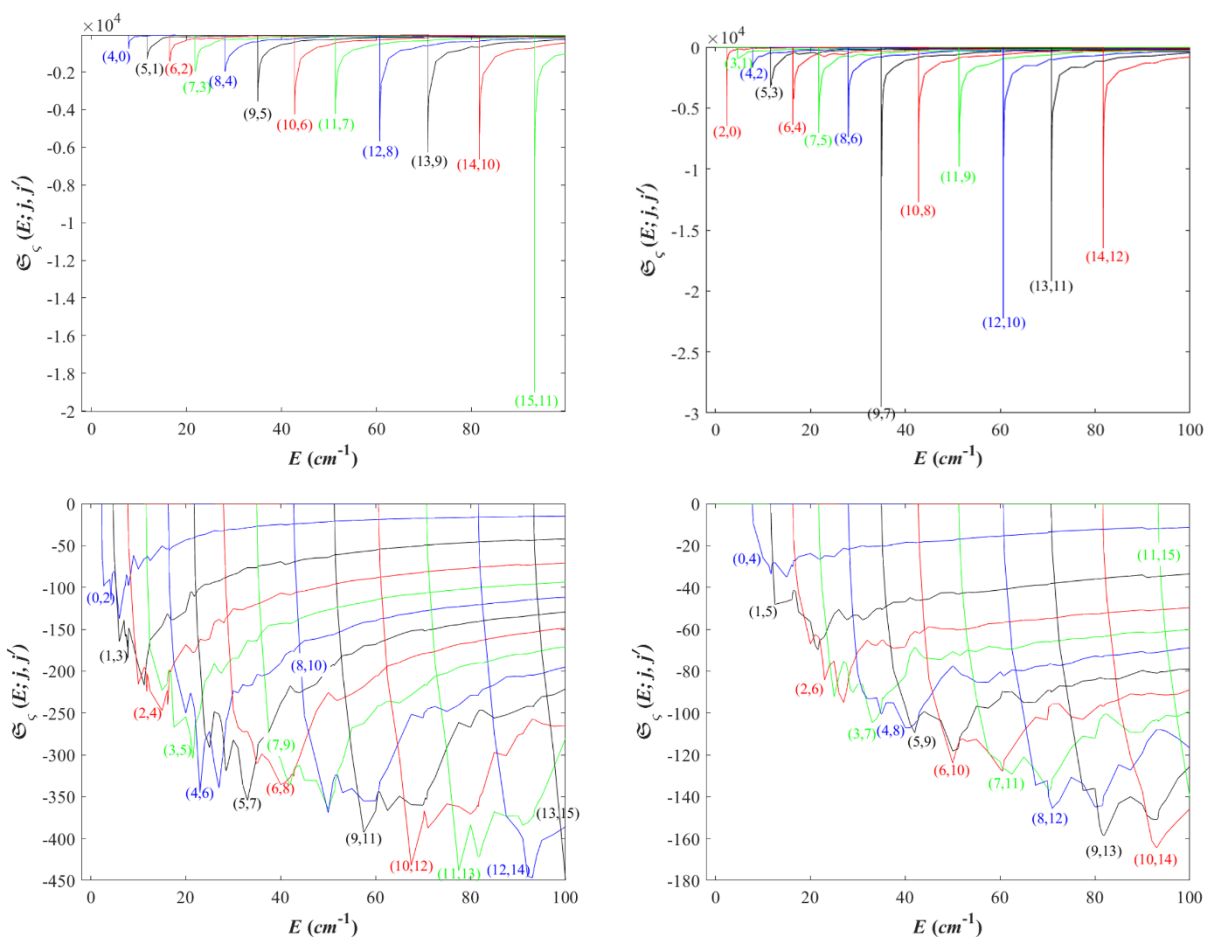

**Fig. S.6.** Energy dependent state-to-state rotational relaxation cross section ( $\mathfrak{S}_\zeta(E; j, j')$ ) as a function of energy ( $E$ ) for off-diagonal (i.e.,  $j \neq j'$  in  $j \rightarrow j'$ ) rotational transitions.

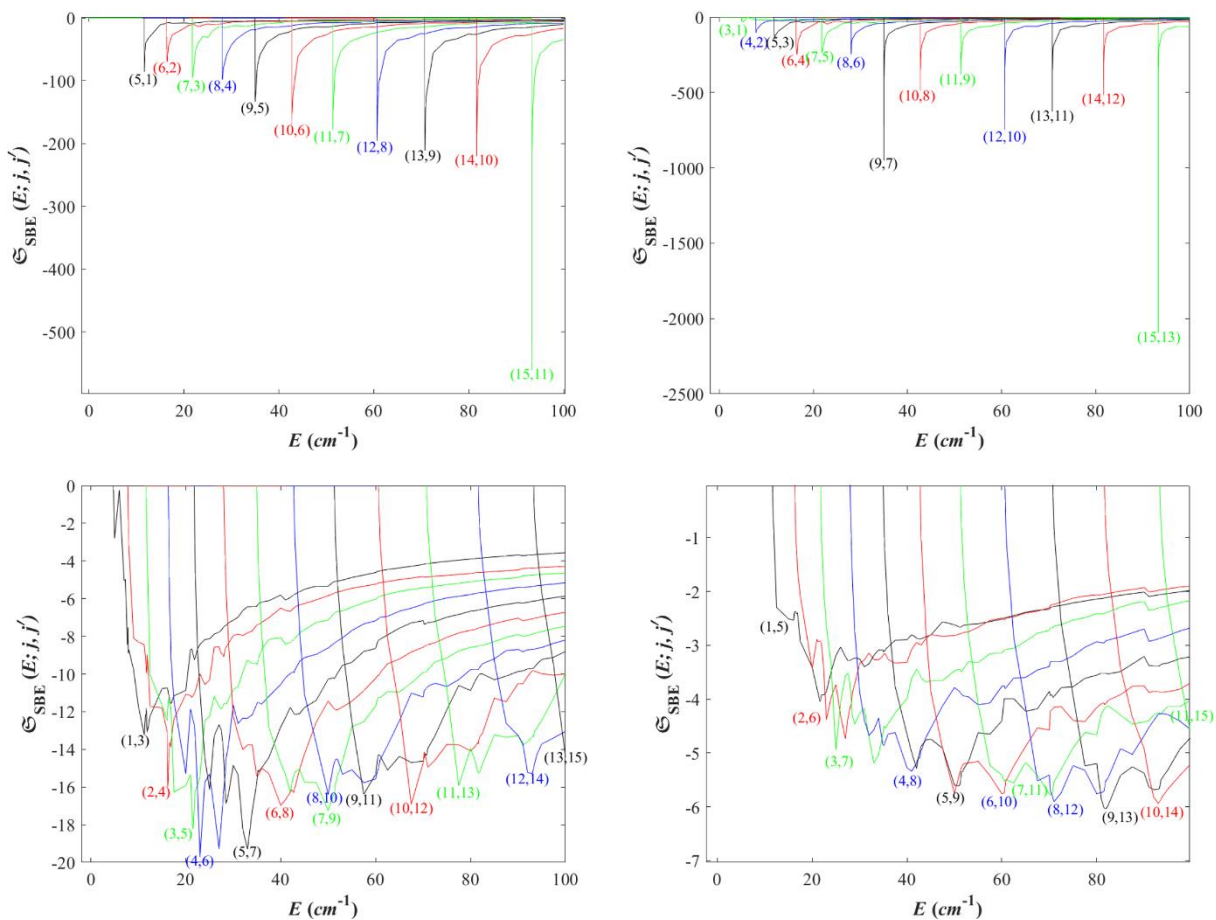

**Fig. S.7.** Energy dependent state-to-state viscomagnetic cross section ( $\mathfrak{S}_{\text{SBE}}(E; j, j')$ ) as a function of energy ( $E$ ) for off-diagonal (i.e.,  $j \neq j'$  in  $j \rightarrow j'$ ) rotational transitions.

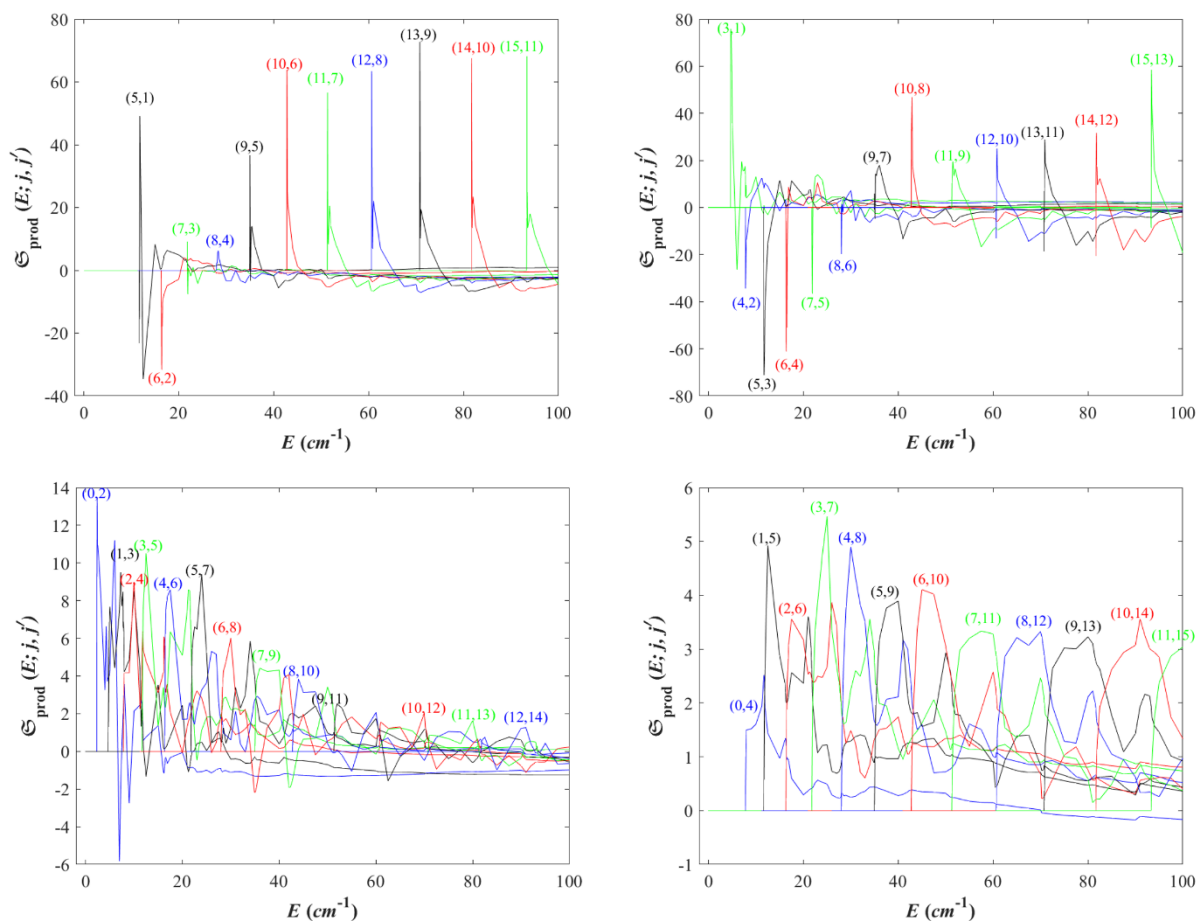

**Fig. S.8.** Energy dependent state-to-state production cross section ( $\mathfrak{S}_{\text{prod}}(E; j, j')$ ) as a function of energy ( $E$ ) for off-diagonal (i.e.,  $j \neq j'$  in  $j \rightarrow j'$ ) rotational transitions.

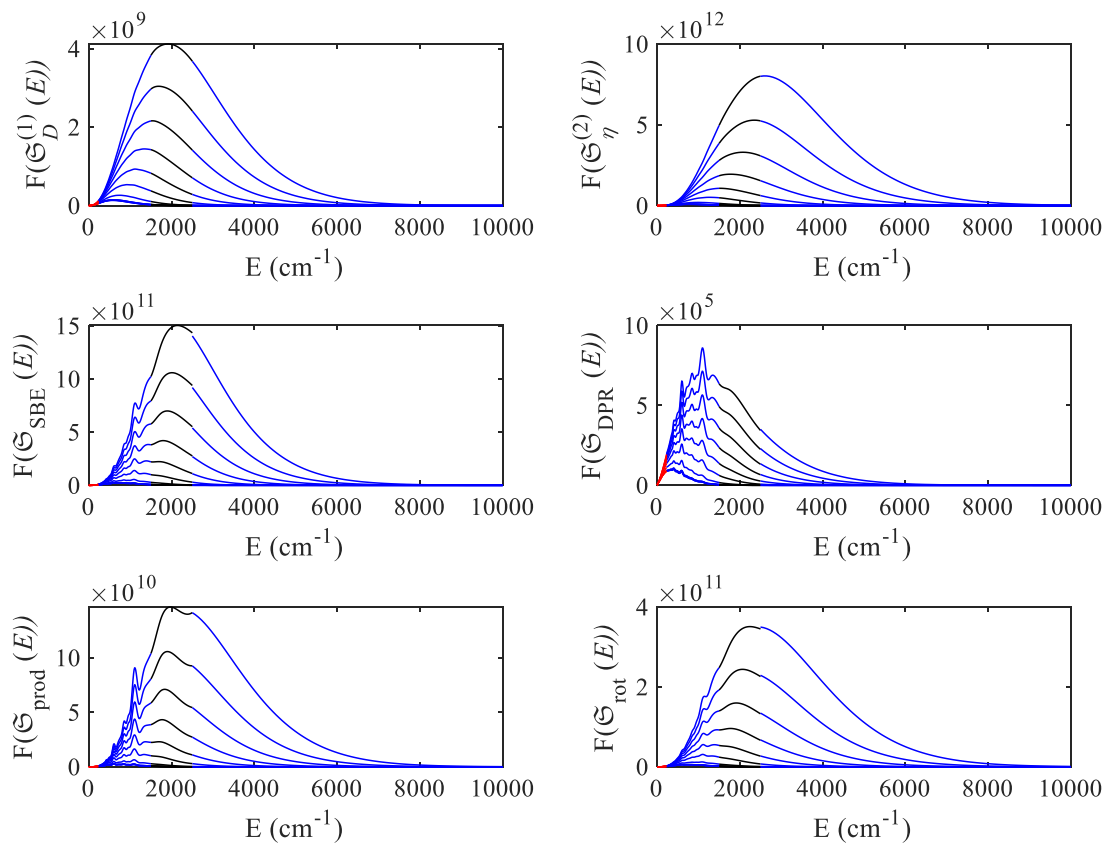

**Fig. S.9.** The integration function of the temperature dependent cross sections at different temperatures as function of energy. The lowest graph is at  $T = 20$  K and the highest one corresponds to  $T = 1000$  K in each figure.

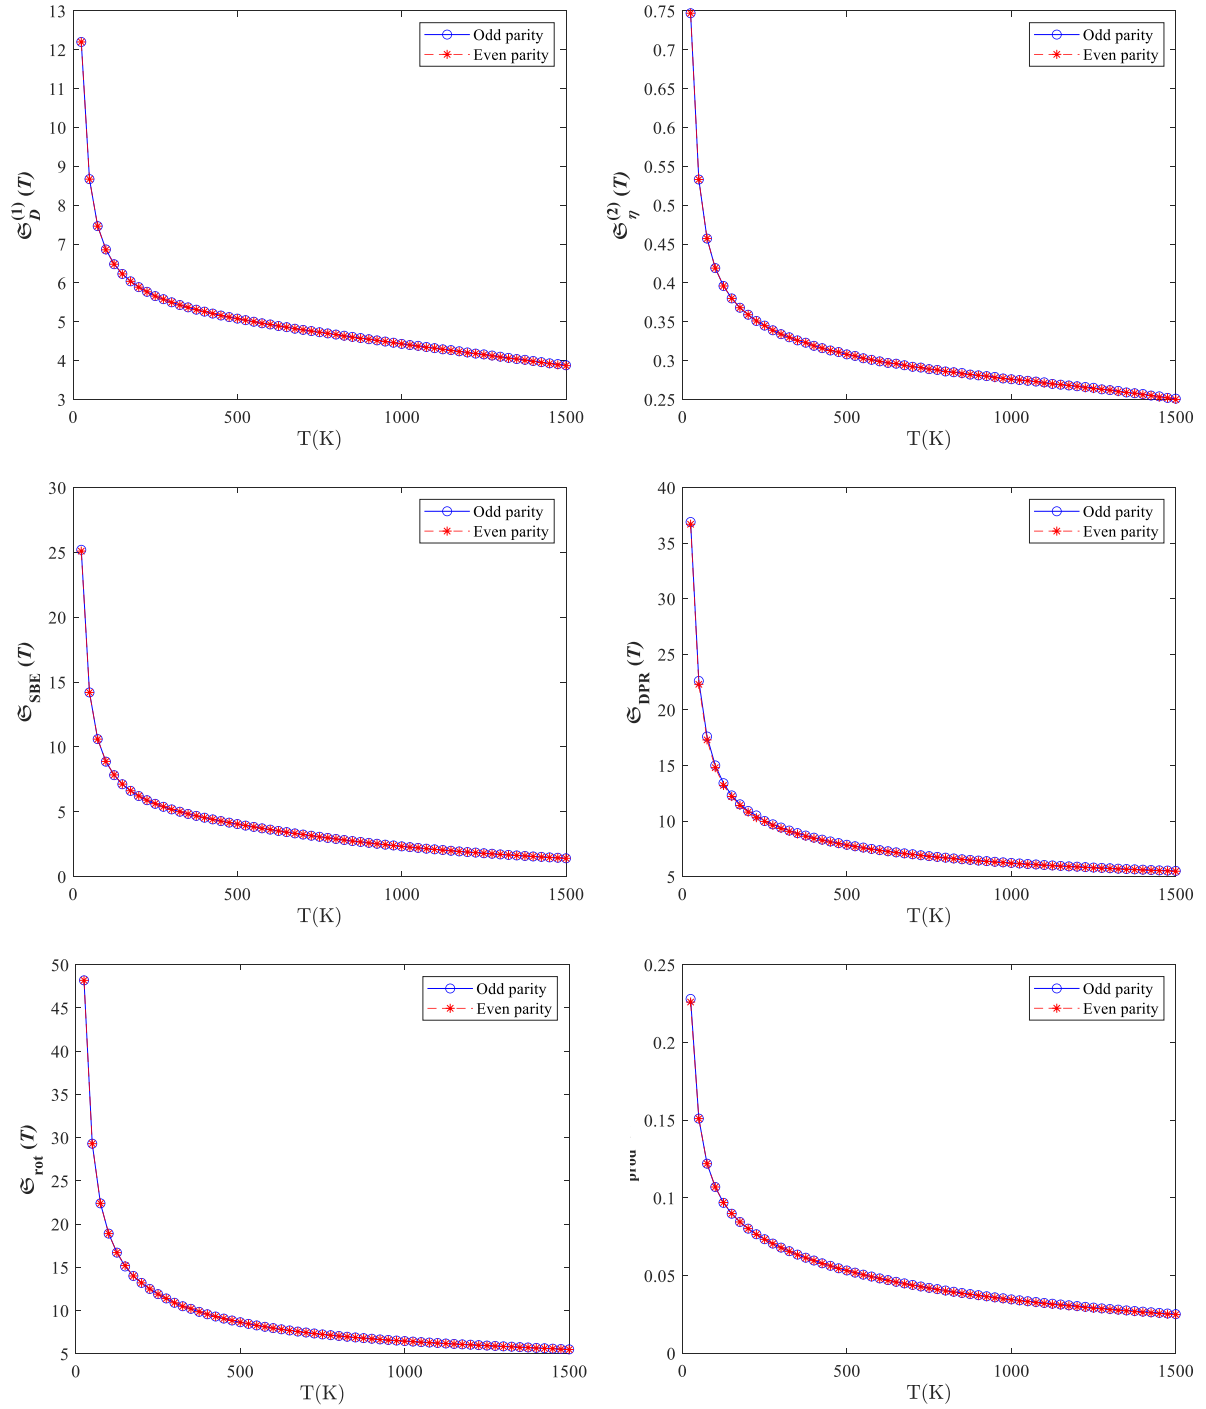

**Fig. S.10.** Temperature dependent SBE cross-sections ( $\mathfrak{S}(T)$ ) for even ( $j \rightarrow j'$ ; with  $j, j' = 0, 2, 4, \dots$ ) and odd ( $j \rightarrow j'$ ; with  $j, j' = 1, 3, 5, \dots$ ) parities.

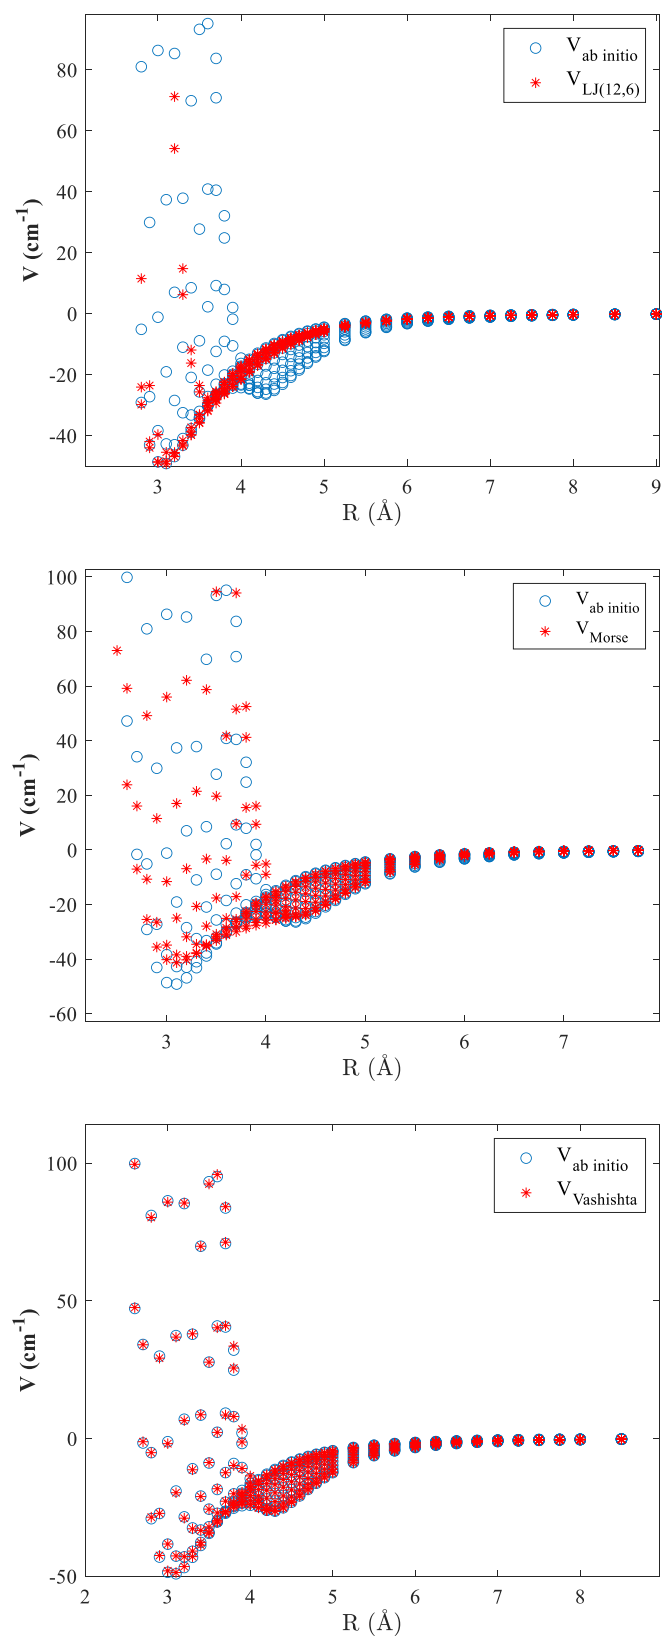

**Fig. S.11.** Comparison of the ab-initio potentials with LJ (12,6), Morse, and Vashishta potential models.

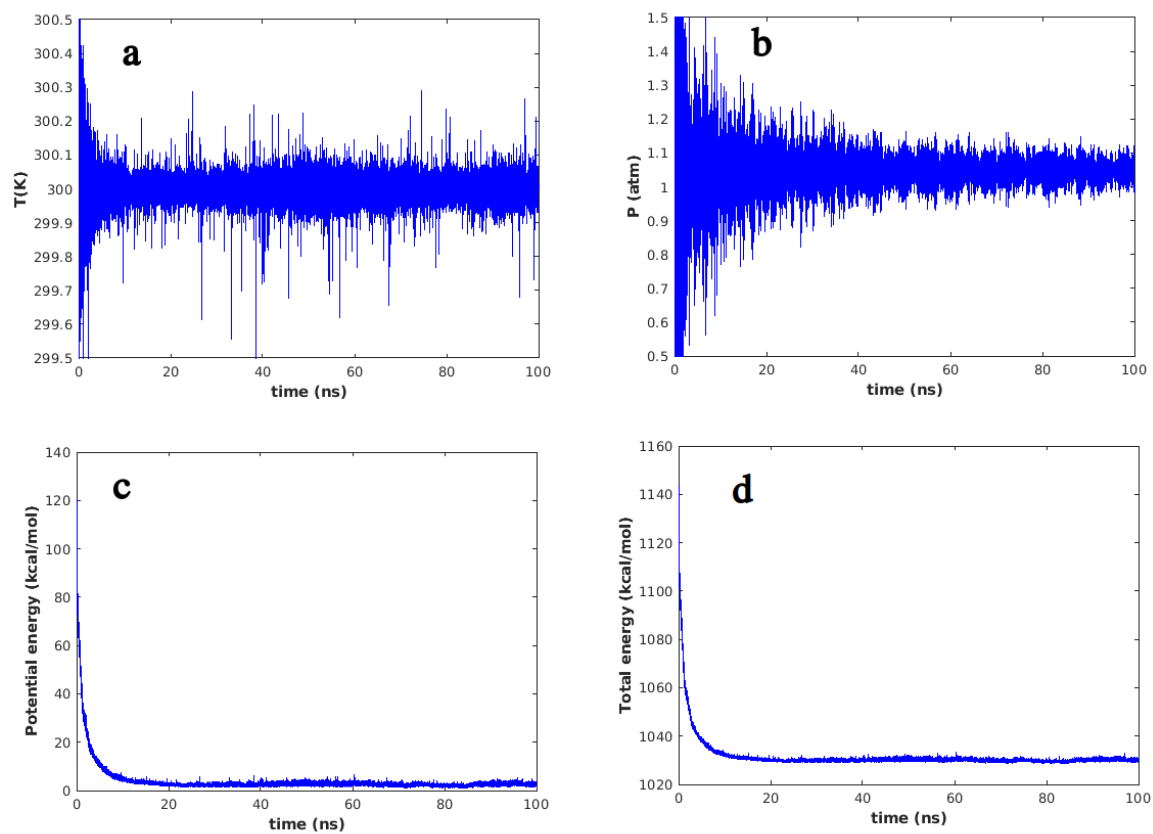

**Fig. S.12** Calculated a: temperature, b: pressure, c: potential energy, and d: total energy as functions of simulation time for a 100 ns molecular dynamics simulation at  $T = 300$  K using LJ (12,6) potential model.



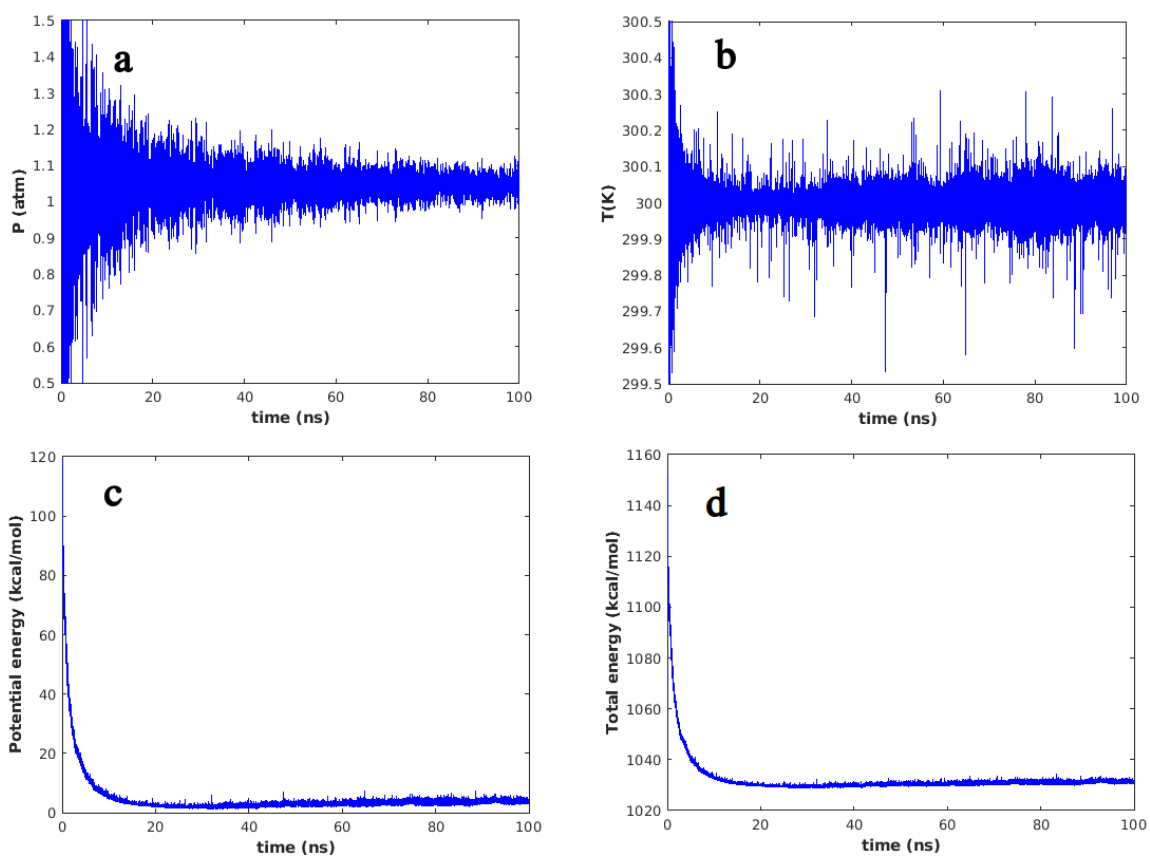

**Fig. S.13.** Calculated a: temperature, b: pressure, c: potential energy, and d: total energy as functions of simulation time for a 100 ns molecular dynamics simulation at  $T = 300$  K using Morse potential model.

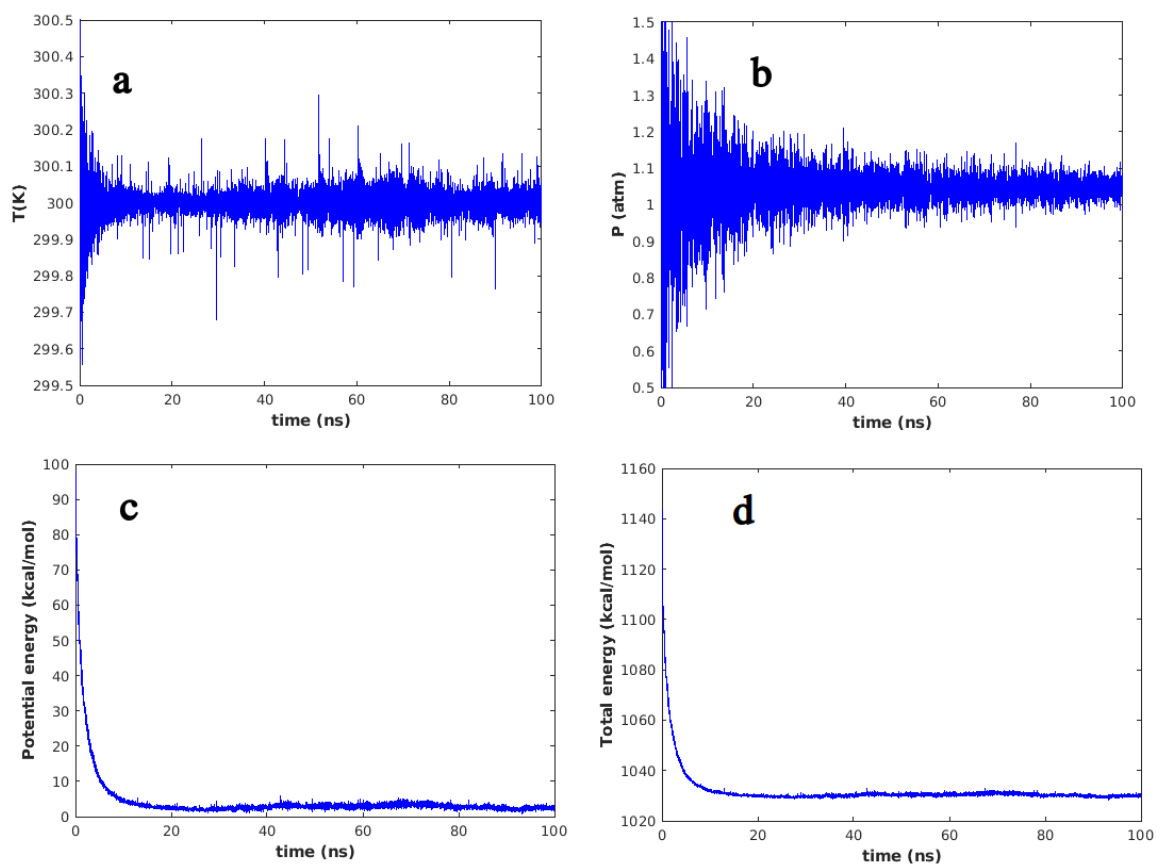

**Fig. S.14.** Calculated a: temperature, b: pressure, c: potential energy, and d: total energy as functions of simulation time for a 100 ns molecular dynamics simulation at  $T = 300$  K using Vashishta potential model.

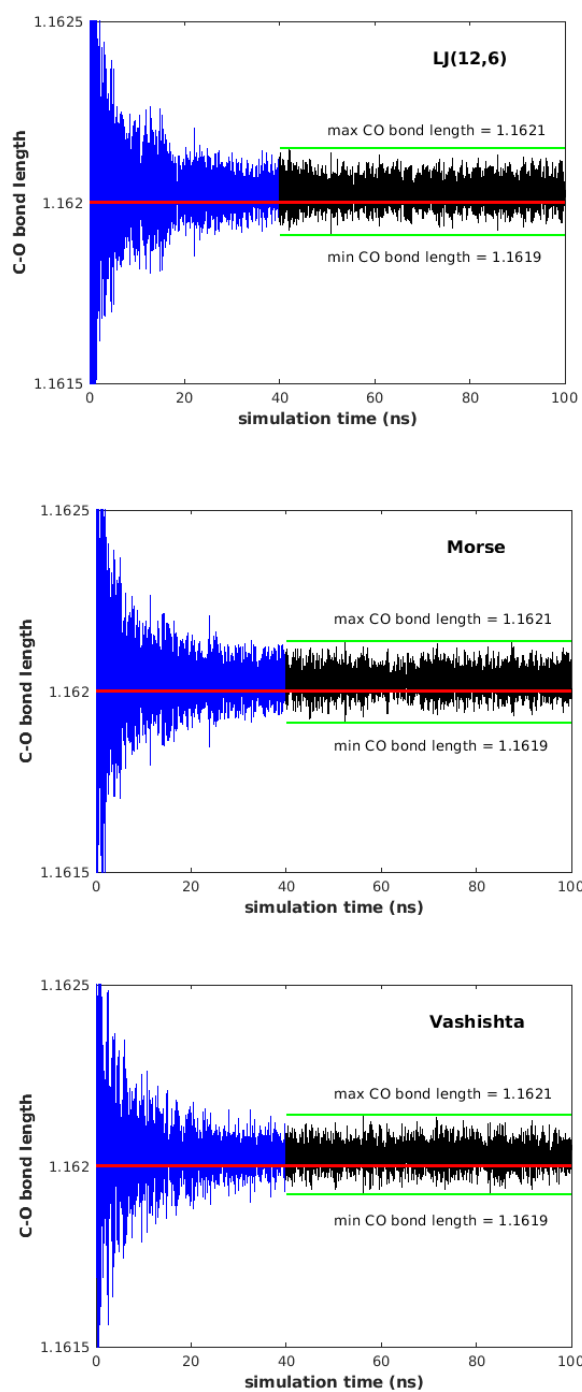

**Fig. S.15.** C-O bond length of CO<sub>2</sub> molecule during the molecular dynamic simulation at T = 300 K using different potential models.
